# Supplementary material
Source: Springer Nature journal article supplement (https://www.springermedizin.de/resource/supplementary/13005_2014_340_MOESM8_ESM.pdf/9625984)
Supplement: MOESM8 [file 9625984]

**Dedection rate of mucosal thickening in the maxillary sinus on panoramic radiographs**

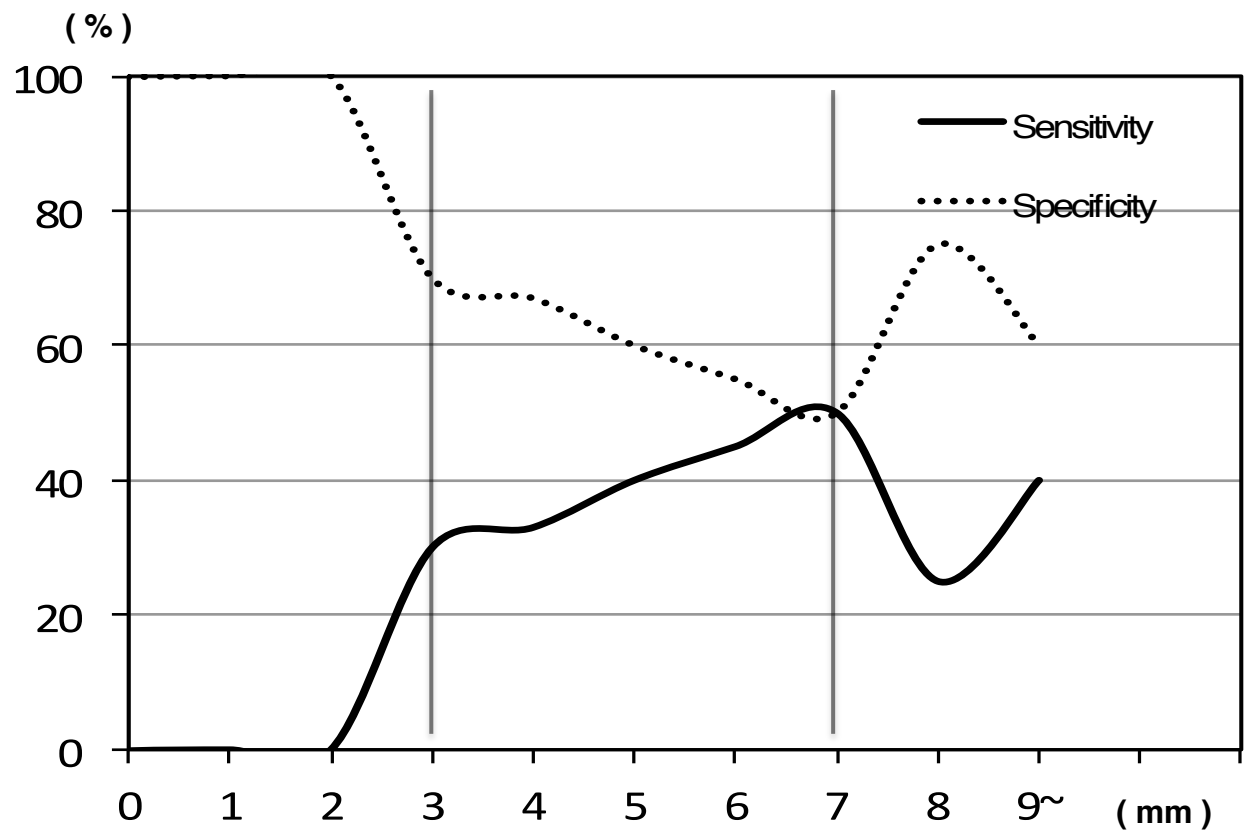

**Width of mucosal thickening in the maxillary sinus**
